# Supplementary material for: Clinical Significance of Pleural Attachment and Indentation of Subsolid Nodule Lung Cancer
Source: PubMed Central journal article supplement — Cancer Res Treat. 2019 Mar 25;51(4):1540–8. doi: 10.4143/crt.2019.057 (PMC6790827; doi:10.4143/crt.2019.057), 2019-03-25
Supplement: crt-2019-057-suppl2.pdf [file crt-2019-057-suppl2.pdf]

**S2 Table.** Pathological findings of subsolid lung adenocarcinomas

| Variable                      | A(-) I(-)<br>(n=120) | A(+) I(-)<br>(n=26) | A(-) I(+)<br>(n=117) | A(+) I(+)<br>(n=141) | p-value |
|-------------------------------|----------------------|---------------------|----------------------|----------------------|---------|
| Pathological T category       |                      |                     |                      |                      |         |
| T1                            | 118 (98.3)           | 24 (92.3)           | 94 (80.3)            | 96 (68.1)            | < 0.001 |
| T2                            | 2 (3.4)              | 2 (7.8)             | 22 (18.8)            | 42 (29.8)            |         |
| T3-4                          | 0 (0.0)              | 0 (0.0)             | 1 (0.9)              | 3 (2.1)              |         |
| Pathological N category       |                      |                     |                      |                      |         |
| Nx                            | 28 (23.3)            | 5 (19.2)            | 17 (14.5)            | 23 (16.3)            | 0.235   |
| N0                            | 90 (75.0)            | 21 (80.8)           | 96 (82.1)            | 106 (75.2)           |         |
| N1                            | 1 (0.8)              | 0 (0.0)             | 1 (0.9)              | 7 (5.0)              |         |
| N2                            | 1 (0.8)              | 0 (0.0)             | 3 (2.6)              | 5 (3.6)              |         |
| Overall pathological category |                      |                     |                      |                      |         |
| I                             | 118 (98.3)           | 25 (96.2)           | 108 (92.3)           | 123 (87.2)           | 0.038   |
| II                            | 1 (0.8)              | 1 (3.9)             | 6 (5.1)              | 12 (8.5)             |         |
| III                           | 1 (0.8)              | 0 (0.0)             | 3 (2.6)              | 6 (4.3)              |         |
| Vascular invasion             | 0 (0.0)              | 0 (0.0)             | 17 (14.5)            | 20 (14.2)            | < 0.001 |
| Lymphatic invasion            | 5 (4.2)              | 2 (7.7)             | 25 (21.4)            | 31 (22.0)            | < 0.001 |

Values are presented as number (%). A, attachment; I, indentation.
