# Supplementary material for: Clinical Significance of Pleural Attachment and Indentation of Subsolid Nodule Lung Cancer
Source: PubMed Central journal article supplement — Cancer Res Treat. 2019 Mar 25;51(4):1540–8. doi: 10.4143/crt.2019.057 (PMC6790827; doi:10.4143/crt.2019.057), 2019-03-25
Supplement: crt-2019-057-suppl3.pdf [file crt-2019-057-suppl3.pdf]

**S3 Table.** Effect of clinical and radiographic factors on time to recurrence of subsolid lung adenocarcinomas

| Variable                       | Unadjusted HR<br>(95% CI) | p-value | Adjusted HR<br>(95% CI) | p-value |
|--------------------------------|---------------------------|---------|-------------------------|---------|
| Age (yr)                       | 1.03 (0.99-1.07)          | 0.103   | -                       | -       |
| Male sex                       | 0.97 (0.48-1.96)          | 0.925   | -                       | -       |
| Ever smoker                    | 2.02 (1.03-3.95)          | 0.042   | 2.20 (1.11-4.35)        | 0.024   |
| Pulmonary function             |                           |         |                         |         |
| FVC (L)                        | 0.86 (0.54-1.38)          | 0.535   | -                       | -       |
| FEV <sub>1</sub> (L)           | 0.76 (0.41-1.37)          | 0.354   | -                       | -       |
| FEV <sub>1</sub> /FVC (%)      | 0.99 (0.95-1.02)          | 0.426   | -                       | -       |
| High risk of VPI <sup>a)</sup> | 4.59 (2.31-9.10)          | < 0.001 | 3.31 (1.58-6.91)        | 0.001   |
| Longest diameter (cm)          | 1.47 (1.27-1.70)          | < 0.001 | 1.42 (1.21-1.67)        | < 0.001 |

FVC, forced vital capacity; FEV<sub>1</sub>, forced expiratory volume in 1 second; HR, hazard ratio; VPI, visceral pleural invasion. <sup>a)</sup>Concurrent pleural attachment with indentation, along with the solid portion > 5 mm.
